# Supplementary material for: Assay for Evaluating the Abundance of <em>Vibrio Cholerae</em> and Its O1 Serogroup Subpopulation Directly from Water Without DNA Extraction
Source: Preprints.org preprint supplement (doi:10.20944/preprints202202.0286.v1), 2022-02-23
Supplement: Supplementary file 1 [file supplementary]

**Supplementary data**

**Table S1.** Determination of limit of detection of sample after concentrating step and testing inhibition in the assay

| **No of copies/**  **1mL sample** | **No of copies/**  **500μL sample** | **No of copies/**  **10μL concentrate** | **Cq values with STDEV of Replicates** | | | | |
| --- | --- | --- | --- | --- | --- | --- | --- |
|  |  |  | Replicate 1 | Replicate 2 | Replicate 3 | Mean (Cq) | STDEV |
| 3000 | 1500 | 1500 | 27.0 | 27.0 | 27.0 | 27.0 | 0.01 |
| 300 | 150 | 150 | 30.2 | 30.0 | 30.2 | 30.1 | 0.08 |
| 30 | 15 | 15 | 33.5 | 33.7 | 33.5 | 33.6 | 0.09 |
| 3 | 1.5 | 1.5 |  |  |  |  |  |
| 6 | 3 | 3 | 35.8 | 34.7 | 35.9 | 35.5 | 0.52 |
| 5 | 2.5 | 2.5 | 36.7 | 36.9 | 36.8 | 36.8 | 0.09 |

‘Blank’ indicates no amplification
